# Supplementary material for: Effectiveness of Hyaluronic Acid Gel Injection with and without PRGF for Management of Interdental Papillary Loss: A Randomized Clinical Trial
Source: MDPI journal article supplement (doi:10.3390/jfb14020114), 2023-02-18
Supplement: s1 [file s1]

**Supplementary Table S1.** Descriptive statistics of Papillary Width, Papillary Deficient Height, Deficient Area, Deficient Volume values of Group Hyaluronic acid alone (HA) at baseline, 3 weeks, 6 weeks, 12 weeks

|                                   | HA              |                    |                |                    |                |                    |                 |                    |
|-----------------------------------|-----------------|--------------------|----------------|--------------------|----------------|--------------------|-----------------|--------------------|
|                                   | Baseline (n=18) |                    | 3 Weeks (n=18) |                    | 6 Weeks (n=18) |                    | 12 Weeks (n=17) |                    |
|                                   | Mean            | Standard Deviation | Mean           | Standard Deviation | Mean           | Standard Deviation | Mean            | Standard Deviation |
| Papillary Width, mm               | 0.94            | 0.35               | 0.81           | 0.29               | 0.68           | 0.32               | 0.60            | 0.36               |
| Papillary Deficient Height, mm    | 1.28            | 0.69               | 1.18           | 0.68               | 1.04           | 0.53               | 0.89            | 0.61               |
| Deficient Area, mm <sup>2</sup>   | 0.61            | 0.45               | 0.54           | 0.49               | 0.42           | 0.41               | 0.36            | 0.44               |
| Deficient Volume, mm <sup>3</sup> | 1.79            | 1.32               | 1.20           | 1.15               | 0.71           | 0.67               | 0.46            | 0.61               |

**Supplementary Table S2.** Descriptive statistics of Papillary Width, papillary Deficient Height, Deficient Area, Deficient Volume values of Group Hyaluronic acid (HA) + PRGF at baseline, 3 weeks, 6 weeks, 12 weeks

|                                   | HA + PRGF       |                    |                |                    |                |                    |                 |                    |
|-----------------------------------|-----------------|--------------------|----------------|--------------------|----------------|--------------------|-----------------|--------------------|
|                                   | Baseline (n=18) |                    | 3 Weeks (n=18) |                    | 6 Weeks (n=18) |                    | 12 Weeks (n=17) |                    |
|                                   | Mean            | Standard Deviation | Mean           | Standard Deviation | Mean           | Standard Deviation | Mean            | Standard Deviation |
| Papillary Width, mm               | 0.77            | 0.24               | 0.69           | 0.21               | 0.64           | 0.21               | 0.54            | 0.19               |
| Papillary Deficient Height, mm    | 1.12            | 0.32               | 0.90           | 0.11               | 0.56           | 0.20               | 0.33            | 0.21               |
| Deficient Area, mm <sup>2</sup>   | 0.42            | 0.16               | 0.31           | 0.11               | 0.17           | 0.06               | 0.09            | 0.05               |
| Deficient Volume, mm <sup>3</sup> | 1.42            | 0.62               | 0.80           | 0.31               | 0.35           | 0.15               | 0.12            | 0.07               |

**Supplementary Table S3.** Intragroup comparisons of Papillary Width (mm) at baseline, 3, 6 and 12 weeks for both groups.

| Paired Samples Test <sup>a</sup> |                     |                    |                    |                     |                                           |       |      |       |         |
|----------------------------------|---------------------|--------------------|--------------------|---------------------|-------------------------------------------|-------|------|-------|---------|
|                                  |                     | Paired Differences |                    |                     |                                           |       | T    | Df    | p-value |
|                                  |                     | Mean               | Standard Deviation | Standard Error Mean | 95% Confidence Interval of the Difference |       |      |       |         |
|                                  |                     |                    |                    |                     | Lower                                     | Upper |      |       |         |
| HA                               | Baseline - 3 Weeks  | 0.14               | 0.22               | 0.05                | 0.03                                      | 0.25  | 2.60 | 17.00 | 0.019   |
| HA+PRGF                          |                     | 0.08               | 0.10               | 0.02                | 0.03                                      | 0.13  | 3.49 | 17.00 | 0.003   |
| HA                               | Baseline - 6 Weeks  | 0.26               | 0.30               | 0.07                | 0.11                                      | 0.41  | 3.73 | 17.00 | 0.002   |
| HA+PRGF                          |                     | 0.13               | 0.12               | 0.03                | 0.07                                      | 0.19  | 4.60 | 17.00 | < 0.001 |
| HA                               | Baseline - 12 Weeks | 0.34               | 0.36               | 0.09                | 0.15                                      | 0.52  | 3.89 | 16.00 | 0.001   |
| HA+PRGF                          |                     | 0.23               | 0.17               | 0.04                | 0.14                                      | 0.32  | 5.59 | 16.00 | < 0.001 |
| HA                               | 3 Weeks - 6 Weeks   | 0.13               | 0.10               | 0.02                | 0.08                                      | 0.17  | 5.38 | 17.00 | < 0.001 |
| HA+PRGF                          |                     | 0.05               | 0.06               | 0.01                | 0.02                                      | 0.08  | 3.25 | 17.00 | 0.005   |
| HA                               | 3 Weeks - 12 Weeks  | 0.20               | 0.15               | 0.04                | 0.12                                      | 0.28  | 5.41 | 16.00 | < 0.001 |
| HA+PRGF                          |                     | 0.15               | 0.12               | 0.03                | 0.09                                      | 0.21  | 5.34 | 16.00 | < 0.001 |
| HA                               | 6 Weeks - 12 Weeks  | 0.08               | 0.06               | 0.01                | 0.04                                      | 0.11  | 5.13 | 16.00 | < 0.001 |
| HA+PRGF                          |                     | 0.11               | 0.07               | 0.02                | 0.07                                      | 0.15  | 6.14 | 16.00 | < 0.001 |

**Supplementary Table S4.** Intragroup comparisons of Papillary Deficient Height (mm) at baseline, 3, 6 and 12 weeks for both groups.

| Paired Samples Test <sup>a</sup> |                     |                    |                    |                     |                                           |       |       |       |         |
|----------------------------------|---------------------|--------------------|--------------------|---------------------|-------------------------------------------|-------|-------|-------|---------|
|                                  |                     | Paired Differences |                    |                     |                                           |       | t     | df    | p-value |
|                                  |                     | Mean               | Standard Deviation | Standard Error Mean | 95% Confidence Interval of the Difference |       |       |       |         |
|                                  |                     |                    |                    |                     | Lower                                     | Upper |       |       |         |
| HA                               | Baseline - 3 Weeks  | 0.10               | 0.06               | 0.01                | 0.07                                      | 0.13  | 7.14  | 17.00 | < 0.001 |
| HA+PRGF                          |                     | 0.22               | 0.30               | 0.07                | 0.07                                      | 0.37  | 3.06  | 17.00 | 0.007   |
| HA                               | Baseline - 6 Weeks  | 0.24               | 0.17               | 0.04                | 0.15                                      | 0.32  | 6.08  | 17.00 | < 0.001 |
| HA+PRGF                          |                     | 0.56               | 0.30               | 0.07                | 0.41                                      | 0.71  | 7.95  | 17.00 | < 0.001 |
| HA                               | Baseline - 12 Weeks | 0.41               | 0.23               | 0.06                | 0.29                                      | 0.52  | 7.35  | 16.00 | < 0.001 |
| HA+PRGF                          |                     | 0.80               | 0.30               | 0.07                | 0.65                                      | 0.96  | 10.99 | 16.00 | < 0.001 |
| HA                               | 3 Weeks - 6 Weeks   | 0.14               | 0.17               | 0.04                | 0.05                                      | 0.22  | 3.44  | 17.00 | 0.003   |
| HA+PRGF                          |                     | 0.34               | 0.18               | 0.04                | 0.25                                      | 0.44  | 7.89  | 17.00 | < 0.001 |
| HA                               | 3 Weeks - 12 Weeks  | 0.31               | 0.21               | 0.05                | 0.20                                      | 0.41  | 6.05  | 16.00 | < 0.001 |
| HA+PRGF                          |                     | 0.58               | 0.22               | 0.05                | 0.47                                      | 0.69  | 10.82 | 16.00 | < 0.001 |
| HA                               | 6 Weeks - 12 Weeks  | 0.17               | 0.20               | 0.05                | 0.06                                      | 0.27  | 3.45  | 16.00 | 0.003   |
| HA+PRGF                          |                     | 0.22               | 0.10               | 0.02                | 0.17                                      | 0.28  | 8.97  | 16.00 | < 0.001 |

**Supplementary Table S5.** Intragroup comparisons of Deficient Area (mm<sup>2</sup>) at baseline, 3 weeks, 6 weeks and 12 weeks for Group HA alone

| Paired Samples Test <sup>a</sup> |                     |                    |                |                 |                                           |       |      |       |          |
|----------------------------------|---------------------|--------------------|----------------|-----------------|-------------------------------------------|-------|------|-------|----------|
|                                  |                     | Paired Differences |                |                 |                                           |       | t    | df    | p- value |
|                                  |                     | Mean               | Std. Deviation | Std. Error Mean | 95% Confidence Interval of the Difference |       |      |       |          |
|                                  |                     |                    |                |                 | Lower                                     | Upper |      |       |          |
| HA                               | Baseline - 3 Weeks  | 0.07               | 0.13           | 0.03            | 0.01                                      | 0.14  | 2.39 | 17.00 | 0.028    |
| HA+PRGF                          |                     | 0.11               | 0.12           | 0.03            | 0.05                                      | 0.17  | 3.97 | 17.00 | 0.001    |
| HA                               | Baseline - 6 Weeks  | 0.19               | 0.15           | 0.04            | 0.12                                      | 0.27  | 5.41 | 17.00 | < 0.001  |
| HA+PRGF                          |                     | 0.25               | 0.14           | 0.03            | 0.18                                      | 0.32  | 7.40 | 17.00 | < 0.001  |
| HA                               | Baseline - 12 Weeks | 0.25               | 0.19           | 0.05            | 0.15                                      | 0.35  | 5.41 | 16.00 | < 0.001  |
| HA+PRGF                          |                     | 0.34               | 0.16           | 0.04            | 0.26                                      | 0.42  | 8.94 | 16.00 | < 0.001  |
| HA                               | 3 Weeks - 6 Weeks   | 0.12               | 0.09           | 0.02            | 0.07                                      | 0.17  | 5.44 | 17.00 | < 0.001  |
| HA+PRGF                          |                     | 0.14               | 0.09           | 0.02            | 0.09                                      | 0.18  | 6.52 | 17.00 | < 0.001  |
| HA                               | 3 Weeks - 12 Weeks  | 0.18               | 0.11           | 0.03            | 0.12                                      | 0.24  | 6.66 | 16.00 | < 0.001  |
| HA+PRGF                          |                     | 0.23               | 0.12           | 0.03            | 0.17                                      | 0.29  | 8.09 | 16.00 | < 0.001  |
| HA                               | 6 Weeks - 12 Weeks  | 0.06               | 0.05           | 0.01            | 0.03                                      | 0.09  | 4.85 | 16.00 | < 0.001  |
| HA+PRGF                          |                     | 0.09               | 0.04           | 0.01            | 0.07                                      | 0.11  | 9.67 | 16.00 | < 0.001  |

**Supplementary Table S6.** Intragroup comparisons of Deficient Volume (mm<sup>3</sup>) at baseline, 3 weeks, 6 weeks and 12 weeks for Group HA alone.

| Paired Samples Test <sup>a</sup> |                     |                    |                |                 |                                           |       |       |       |         |
|----------------------------------|---------------------|--------------------|----------------|-----------------|-------------------------------------------|-------|-------|-------|---------|
|                                  |                     | Paired Differences |                |                 |                                           |       | t     | df    | p-value |
|                                  |                     | Mean               | Std. Deviation | Std. Error Mean | 95% Confidence Interval of the Difference |       |       |       |         |
|                                  |                     |                    |                |                 | Lower                                     | Upper |       |       |         |
| HA                               | Baseline - 3 Weeks  | 0.59               | 0.49           | 0.11            | 0.35                                      | 0.83  | 5.14  | 17.00 | < 0.001 |
| HA+PRGF                          |                     | 0.63               | 0.39           | 0.09            | 0.43                                      | 0.82  | 6.84  | 17.00 | <0.001  |
| HA                               | Baseline - 6 Weeks  | 1.08               | 0.74           | 0.18            | 0.71                                      | 1.45  | 6.15  | 17.00 | < 0.001 |
| HA+PRGF                          |                     | 1.07               | 0.55           | 0.13            | 0.80                                      | 1.35  | 8.24  | 17.00 | 0.000   |
| HA                               | Baseline - 12 Weeks | 1.33               | 0.86           | 0.21            | 0.89                                      | 1.78  | 6.41  | 16.00 | < 0.001 |
| HA+PRGF                          |                     | 1.33               | 0.60           | 0.15            | 1.02                                      | 1.65  | 9.10  | 16.00 | 0.000   |
| HA                               | 3 Weeks - 6 Weeks   | 0.49               | 0.52           | 0.12            | 0.23                                      | 0.75  | 3.98  | 17.00 | 0.001   |
| HA+PRGF                          |                     | 0.44               | 0.21           | 0.05            | 0.34                                      | 0.55  | 8.91  | 17.00 | 0.000   |
| HA                               | 3 Weeks - 12 Weeks  | 0.75               | 0.58           | 0.14            | 0.45                                      | 1.05  | 5.29  | 16.00 | < 0.001 |
| HA+PRGF                          |                     | 0.69               | 0.28           | 0.07            | 0.55                                      | 0.84  | 10.24 | 16.00 | 0.000   |
| HA                               | 6 Weeks - 12 Weeks  | 0.26               | 0.18           | 0.04            | 0.17                                      | 0.35  | 6.05  | 16.00 | < 0.001 |
| HA+PRGF                          |                     | 0.24               | 0.10           | 0.02            | 0.18                                      | 0.29  | 9.78  | 16.00 | 0.000   |

**Supplementary Table S7.** Intergroup Comparisons of percentage change in Deficient Area between Group HA alone and Group HA+ PRGF.

|          | Levene's Test for Equality of Variances | t-test for Equality of Means |       |       |         |                 |                       |                                           |
|----------|-----------------------------------------|------------------------------|-------|-------|---------|-----------------|-----------------------|-------------------------------------------|
|          |                                         | F                            | t     | df    | p value | Mean Difference | Std. Error Difference | 95% Confidence Interval of the Difference |
|          |                                         |                              |       |       |         |                 |                       | Lower Upper                               |
| 3 Weeks  | 0.03                                    | -0.97                        | 34.00 | 0.340 | -3.87   | 4.00            | -12.00                | 4.26                                      |
| 6 Weeks  | 3.47                                    | -5.87                        | 34.00 | 0.000 | -29.06  | 4.95            | -39.12                | -19.00                                    |
| 12 Weeks | 0.52                                    | -2.97                        | 32.00 | 0.006 | -19.80  | 6.66            | -33.36                | -6.24                                     |

**Supplementary Table S8.** Intergroup comparison of percentage change in Deficient Volume between Group HA alone and Group HA+ PRGF.

|          | Levene's Test for Equality of Variances | t-test for Equality of Means |       |       |         |                 |                       |                                           |
|----------|-----------------------------------------|------------------------------|-------|-------|---------|-----------------|-----------------------|-------------------------------------------|
|          |                                         | F                            | t     | df    | p value | Mean Difference | Std. Error Difference | 95% Confidence Interval of the Difference |
|          |                                         |                              |       |       |         |                 |                       | Lower Upper                               |
| 3 Weeks  | 0.66                                    | -4.00                        | 34.00 | 0.000 | -18.69  | 4.68            | -28.19                | -9.18                                     |
| 6 Weeks  | 2.49                                    | -2.93                        | 34.00 | 0.006 | -17.11  | 5.84            | -28.97                | -5.24                                     |
| 12 Weeks | 8.96                                    | -2.22                        | 32.00 | 0.033 | -9.77   | 4.39            | -18.72                | -0.82                                     |
